# Supplementary material
Source: publisher figshare collection journal article supplement (https://acs.figshare.com/ndownloader/files/7544230)
Supplement: Supplementary file 1 [file 7544230]

## Sheet: DDN All Species
Table S5. Data driven network species (Related to Figures 4D and 5C). This file contains all species in the DDN. Species are listed by gene symbol.
DDN All Species (Gene Symbol)
A2M
A4GALT
AACS
AADAT
AANAT
AARS
AARS2
AASDHPPT
AASS
ABAT
ABCB11
ABCB4
ABCC1
ABCC2
ABCC8
ABHD5
ABL1
ABL2
ABLIM1
ABLIM2
ABLIM3
ABO
ACAA1
ACAA2
ACACA
ACACB
ACAD8
ACADL
ACADM
ACADS
ACADSB
ACADVL
ACAT1
ACAT2
ACE
ACER1
ACER2
ACER3
ACHE
ACIN1
ACKR3
ACLY
ACMSD
ACO1
ACO2
ACOT1
ACOT12
ACOT2
ACOT4
ACOT7
ACOT8
ACOX1
ACOX2
ACOX3
ACP1
ACSBG1
ACSBG2
ACSF3
ACSL1
ACSL3
ACSL4
ACSL5
ACSL6
ACSM1
ACSM2A
ACSM2B
ACSM3
ACSM4
ACSM5
ACSS1
ACSS2
ACSS3
ACTB
ACTC1
ACTG1
ACTN1
ACTN2
ACTN3
ACTN4
ACVR1
ACVR1B
ACVR1C
ACVR2A
ACVR2B
ACY1
ACYP1
ACYP2
ADA
ADAM10
ADAM17
ADCY1
ADCY10
ADCY2
ADCY3
ADCY4
ADCY5
ADCY6
ADCY7
ADCY8
ADCY9
ADCYAP1
ADCYAP1R1
ADH1A
ADH1B
ADH1C
ADH4
ADH5
ADH6
ADH7
ADI1
ADIPOQ
ADIPOR1
ADIPOR2
ADK
ADO
ADORA1
ADORA2A
ADORA2B
ADORA3
ADPGK
ADPRM
ADRA1A
ADRA1B
ADRA1D
ADRA2A
ADRA2B
ADRA2C
ADRB1
ADRB2
ADRB3
ADRBK1
ADRBK2
ADSL
ADSS
ADSSL1
AFMID
AFP
AGAP2
AGER
AGK
AGL
AGMAT
AGPAT1
AGPAT2
AGPAT3
AGPAT4
AGPAT5
AGPAT6
AGPAT9
AGPS
AGRP
AGTR1
AGTR2
AGXT
AGXT2
AHCY
AHCYL1
AHCYL2
AIM2
AJUBA
AK1
AK2
AK3
AK4
AK5
AK6
AK7
AK8
AK9
AKR1A1
AKR1B1
AKR1B10
AKR1C1
AKR1C2
AKR1C3
AKR1C4
AKR1D1
AKT1
AKT1S1
AKT2
AKT3
ALAD
ALAS1
ALAS2
ALDH18A1
ALDH1A1
ALDH1A2
ALDH1A3
ALDH1B1
ALDH1L1
ALDH1L2
ALDH2
ALDH3A1
ALDH3A2
ALDH3B1
ALDH3B2
ALDH4A1
ALDH5A1
ALDH6A1
ALDH7A1
ALDH9A1
ALDOA
ALDOB
ALDOC
ALG1
ALG10
ALG10B
ALG11
ALG12
ALG13
ALG14
ALG2
ALG3
ALG5
ALG6
ALG8
ALG9
ALK
ALLC
ALOX12
ALOX12B
ALOX15
ALOX15B
ALOX5
ALPI
ALPL
ALPP
ALPPL2
ALS2
ALYREF
AMACR
AMD1
AMDHD1
AMDHD2
AMH
AMHR2
AMOT
AMPD1
AMPD2
AMPD3
AMT
AMY1A
AMY2A
AMY2B
ANAPC1
ANAPC10
ANAPC11
ANAPC13
ANAPC2
ANAPC4
ANAPC5
ANAPC7
ANGPT1
ANGPT2
ANGPT4
ANK1
ANK2
ANK3
ANO2
ANPEP
AOC1
AOC2
AOC3
AOX1
APAF1
APBB1
APBB1IP
APC
APC2
APIP
APITD1
APP
APRT
AQP1
AQP2
AQP5
AR
ARAF
ARAP3
ARC
AREG
ARF1
ARF6
ARG1
ARG2
ARHGAP10
ARHGAP35
ARHGAP5
ARHGDIA
ARHGDIB
ARHGDIG
ARHGEF1
ARHGEF11
ARHGEF12
ARHGEF2
ARHGEF26
ARHGEF4
ARHGEF6
ARHGEF7
ARNT
ARNT2
ARPC1A
ARPC1B
ARPC2
ARPC3
ARPC4
ARPC5
ARPC5L
ARRB1
ARRB2
ARSA
ARSB
ASAH1
ASAH2
ASAP1
ASAP2
ASAP3
ASGR1
ASGR2
ASH1L
ASIC1
ASIC2
ASIC3
ASIC4
ASIC5
ASIP
ASL
ASMT
ASNS
ASPA
ASS1
ATF1
ATF2
ATF3
ATF4
ATF6
ATF6B
ATG10
ATG12
ATG13
ATG14
ATG16L1
ATG16L2
ATG3
ATG5
ATG7
ATIC
ATM
ATOX1
ATP12A
ATP1A1
ATP1A2
ATP1A3
ATP1A4
ATP1B1
ATP1B2
ATP1B3
ATP1B4
ATP2A1
ATP2A2
ATP2A3
ATP2B1
ATP2B2
ATP2B3
ATP2B4
ATP4A
ATP4B
ATP5A1
ATP5B
ATP5C1
ATP5D
ATP5E
ATP5F1
ATP5G1
ATP5G2
ATP5G3
ATP5H
ATP5I
ATP5J
ATP5J2
ATP5L
ATP5O
ATP6AP1
ATP6AP2
ATP6V0A1
ATP6V0A2
ATP6V0A4
ATP6V0B
ATP6V0C
ATP6V0D1
ATP6V0D2
ATP6V0E1
ATP6V0E2
ATP6V1A
ATP6V1B1
ATP6V1B2
ATP6V1C1
ATP6V1C2
ATP6V1D
ATP6V1E1
ATP6V1E2
ATP6V1F
ATP6V1G1
ATP6V1G2
ATP6V1G3
ATP6V1H
ATR
AUH
AURKA
AVP
AVPR1A
AVPR1B
AVPR2
AWAT2
AXIN1
AXIN2
AZIN2
B3GALNT1
B3GALT1
B3GALT2
B3GALT4
B3GALT5
B3GALT6
B3GAT3
B3GNT2
B3GNT3
B3GNT4
B3GNT5
B3GNT6
B4GALNT1
B4GALT1
B4GALT2
B4GALT3
B4GALT4
B4GALT5
B4GALT6
B4GALT7
B4GAT1
BAAT
BAD
BAG4
BAI1
BAIAP2
BAK1
BAMBI
BAX
BBC3
BBOX1
BCAR1
BCAT1
BCAT2
BCKDHA
BCKDHB
BCL10
BCL2
BCL2L1
BCL2L11
BCL2L2
BCL6
BCO1
BCR
BDH1
BDH2
BDKRB1
BDKRB2
BDNF
BECN1
BEST2
BHMT
BID
BIRC2
BIRC3
BIRC5
BIRC7
BIRC8
BLNK
BLVRA
BLVRB
BMF
BMI1
BMP2
BMP4
BMP5
BMP6
BMP7
BMP8A
BMP8B
BMPR1A
BMPR1B
BMPR2
BNIP3
BPGM
BPNT1
BRAF
BRAP
BRCA1
BRS3
BST1
BTC
BTD
BTG1
BTG2
BTG3
BTG4
BTK
BTRC
BUB1
BUB3
C1GALT1
C1GALT1C1
C1QA
C1QB
C1QBP
C1QC
C3
C3AR1
C5
C5AR1
C6
C7
C8A
C8B
C8G
C9
CA1
CA12
CA13
CA14
CA2
CA3
CA4
CA5A
CA5B
CA6
CA7
CA8
CA9
CACNA1A
CACNA1B
CACNA1C
CACNA1D
CACNA1E
CACNA1F
CACNA1G
CACNA1H
CACNA1I
CACNA1S
CACNA2D1
CACNA2D2
CACNA2D3
CACNA2D4
CACNB1
CACNB2
CACNB3
CACNB4
CACNG1
CACNG2
CACNG3
CACNG4
CACNG5
CACNG6
CACNG7
CACNG8
CAD
CALB1
CALCR
CALCRL
CALD1
CALM1
CALML3
CALML5
CALML6
CALR
CALY
CAMK1
CAMK1D
CAMK1G
CAMK2A
CAMK2B
CAMK2D
CAMK2G
CAMK4
CAMKK1
CAMKK2
CAMKMT
CAMP
CANT1
CANX
CAPN1
CAPN2
CARD11
CARD18
CARD6
CARD8
CARD9
CARNS1
CARS
CARS2
CASC3
CASK
CASP1
CASP10
CASP12
CASP3
CASP5
CASP6
CASP7
CASP8
CASP9
CAT
CAV1
CAV2
CAV3
CBL
CBLB
CBLC
CBR1
CBR3
CBS
CCBL1
CCBL2
CCDC6
CCKAR
CCKBR
CCL1
CCL11
CCL13
CCL14
CCL15
CCL16
CCL17
CCL18
CCL19
CCL2
CCL20
CCL21
CCL22
CCL23
CCL24
CCL25
CCL26
CCL27
CCL28
CCL3
CCL3L1
CCL4
CCL4L1
CCL5
CCL7
CCL8
CCNA1
CCNA2
CCNB1
CCNB2
CCNB3
CCND1
CCND2
CCND3
CCNE1
CCNE2
CCNG1
CCNG2
CCR1
CCR10
CCR2
CCR3
CCR4
CCR5
CCR6
CCR7
CCR8
CCR9
CD14
CD19
CD209
CD22
CD226
CD244
CD247
CD274
CD28
CD34
CD36
CD38
CD3D
CD3E
CD3G
CD4
CD40
CD40LG
CD44
CD46
CD47
CD48
CD55
CD59
CD72
CD74
CD79A
CD79B
CD80
CD82
CD86
CD8A
CD8B
CDA
CDC16
CDC20
CDC23
CDC25A
CDC25B
CDC25C
CDC26
CDC27
CDC42
CDCA5
CDH1
CDH5
CDIPT
CDK1
CDK2
CDK4
CDK5
CDK5R1
CDK6
CDKN1A
CDKN1B
CDKN2A
CDKN2B
CDKN2D
CDO1
CDS1
CDS2
CEBPA
CEBPB
CEBPG
CECR1
CEL
CEPT1
CER1
CERK
CERS1
CERS2
CERS3
CERS4
CERS5
CERS6
CES1
CES2
CFI
CFL1
CFL2
CFLAR
CFTR
CGA
CGN
CH25H
CHAT
CHD8
CHDH
CHEK1
CHEK2
CHIA
CHIT1
CHKA
CHKB
CHPF
CHPF2
CHPT1
CHRD
CHRM1
CHRM2
CHRM3
CHRM4
CHRM5
CHRNA1
CHRNA10
CHRNA2
CHRNA3
CHRNA4
CHRNA5
CHRNA6
CHRNA7
CHRNA9
CHRNB1
CHRNB2
CHRNB3
CHRNB4
CHRND
CHRNE
CHRNG
CHSY1
CHSY3
CHUK
CIITA
CISH
CKB
CKM
CKMT1A
CKMT2
CKS1B
CKS2
CLCA1
CLCA2
CLCA4
CLDN1
CLDN10
CLDN11
CLDN14
CLDN15
CLDN16
CLDN17
CLDN18
CLDN19
CLDN2
CLDN20
CLDN22
CLDN23
CLDN24
CLDN25
CLDN3
CLDN4
CLDN5
CLDN6
CLDN7
CLDN8
CLDN9
CLEC4M
CMAS
CMPK1
CMPK2
CNDP1
CNDP2
CNGA1
CNGA2
CNGA3
CNGA4
CNGB1
CNGB3
CNOT7
CNOT8
CNR1
CNR2
CNTF
CNTFR
CNTN2
COASY
COL11A1
COL11A2
COL1A1
COL1A2
COL21A1
COL24A1
COL27A1
COL2A1
COL3A1
COL4A1
COL4A2
COL4A3
COL4A4
COL4A5
COL4A6
COL5A1
COL5A2
COL5A3
COL6A1
COL6A2
COL6A3
COL6A5
COL6A6
COL9A1
COL9A2
COL9A3
COLGALT1
COLGALT2
COMP
COMT
COX10
COX15
CP
CPB2
cpd:C02075 cpd:C02588
cpd:C02843 cpd:C20876
cpdC20775
cpdC20776
cpdC20792
cpdC20793
cpdC20825
cpdC20859
cpdC20876
cpdC20877
cpdC20878
cpdC20879
cpdC20970
cpdC21011
cpdC21012
cpdC21013
cpdC21014
cpdC21015
cpdC21016
cpdC21017
cpdC21018
CPEB1
CPEB2
CPEB3
CPEB4
CPOX
CPS1
CPT1A
CPT1B
CPT1C
CPT2
CR1
CR2
CRB3
CREB1
CREB3
CREB3L1
CREB3L2
CREB3L3
CREB3L4
CREB5
CREBBP
CREM
CRH
CRHR1
CRHR2
CRK
CRKL
CRLF2
CRLS1
CRTC1
CRTC2
CRTC3
CRY1
CRY2
CRYL1
CS
CSAD
CSF1
CSF1R
CSF2
CSF2RA
CSF2RB
CSF3
CSF3R
CSGALNACT1
CSGALNACT2
CSH2
CSK
CSN2
CSNK1A1
CSNK1A1L
CSNK1D
CSNK1E
CSNK1G1
CSNK1G2
CSNK1G3
CSNK2A1
CSNK2A2
CSNK2B
CTBP1
CTBP2
CTF1
CTH
CTLA4
CTNNA1
CTNNA2
CTNNA3
CTNNB1
CTNNBIP1
CTNND1
CTPS1
CTPS2
CTSB
CTSD
CTSG
CTSL
CTSS
CTTN
CX3CL1
CX3CR1
CXCL1
CXCL10
CXCL11
CXCL12
CXCL13
CXCL14
CXCL16
CXCL2
CXCL3
CXCL5
CXCL6
CXCL8
CXCL9
CXCR1
CXCR2
CXCR3
CXCR4
CXCR5
CXCR6
CXXC4
CYBA
CYBB
CYCS
CYFIP1
CYFIP2
CYLD
CYP11A1
CYP11B1
CYP11B2
CYP17A1
CYP19A1
CYP1A1
CYP1A2
CYP1B1
CYP21A2
CYP24A1
CYP26A1
CYP26B1
CYP26C1
CYP27A1
CYP27B1
CYP2A13
CYP2A6
CYP2B6
CYP2C18
CYP2C19
CYP2C8
CYP2C9
CYP2D6
CYP2E1
CYP2F1
CYP2J2
CYP2R1
CYP2S1
CYP2U1
CYP39A1
CYP3A4
CYP3A5
CYP3A7
CYP46A1
CYP4A11
CYP4A22
CYP4F2
CYP4F3
CYP4F8
CYP51A1
CYP7A1
CYP7B1
CYP8B1
CYSLTR1
CYSLTR2
CYTH1
CYTH2
CYTH3
CYTH4
DAAM1
DAAM2
DAD1
DAG1
DAO
DAPK1
DAPK2
DAPK3
DAPP1
DARS
DARS2
DAXX
DAZAP1
DBH
DBT
DCC
DCK
DCN
DCT
DCTD
DCTPP1
DCXR
DDB2
DDC
DDIT3
DDIT4
DDO
DDOST
DDX39B
DDX3X
DDX58
DEGS1
DEGS2
DERA
DERL1
DFFA
DFFB
DGAT1
DGAT2
DGKA
DGKB
DGKD
DGKE
DGKG
DGKH
DGKI
DGKK
DGKQ
DGKZ
DGUOK
DHCR24
DHCR7
DHDDS
DHDH
DHFR
DHFRL1
DHH
DHODH
DHRS3
DHRS4
DHRS4L1
DHRS4L2
DHRS9
DHX58
DIAPH1
DIAPH2
DIAPH3
DICER1
DKK1
DKK2
DKK4
DLAT
DLD
DLG1
DLG4
DLGAP1
DLL1
DLL3
DLL4
DLST
DMD
DMGDH
DNAJC3
DNM1
DNM1L
DNM2
DNM3
DNMT1
DNMT3A
DNMT3B
DOCK1
DOCK2
DOCK4
DOK1
DOLK
DOLPP1
DOT1L
DPAGT1
DPM1
DPM2
DPM3
DPYD
DPYS
DPYSL2
dr:D00110
dr:D00195 cpd:C06174
dr:D00252 cpd:C06868
dr:D00343 cpd:C07047
dr:D00346 cpd:C07054
dr:D00358 cpd:C07073
dr:D00399 cpd:C07185
dr:D00536 cpd:C07501
dr:D00584 cpd:C07649
dr:D00842
dr:D00944
dr:D01223 cpd:C12650
dr:D01244 cpd:C12673
dr:D01309 cpd:C12739
dr:D02271
dr:D04197 cpd:C11736
dr:D04716 cpd:C08012
dr:D04931 cpd:C02380
dr:D07445
dr:D07704 cpd:C07572
dr:D07760 cpd:C07888
dr:D08086 cpd:C16641
dr:D08195 cpd:C07163
dr:D08233
dr:D08233 cpd:C01516
dr:D08234
dr:D08559 cpd:C07108
dr:D08603 cpd:C07648
DRD1
DRD2
DRD3
DRD4
DRD5
DTX1
DTX2
DTX3
DTX3L
DTX4
DTYMK
DUSP1
DUSP10
DUSP16
DUSP2
DUSP3
DUSP4
DUSP5
DUSP6
DUSP7
DUSP8
DUSP9
DUT
DVL1
DVL2
DVL3
DYNC1H1
DYNC1I1
DYNC1I2
DYNC1LI1
DYNC1LI2
DYNC2H1
E2F1
E2F2
E2F3
EARS2
EBP
ECHDC1
ECHS1
ECI1
ECI2
ECSIT
EDN1
EDNRA
EDNRB
EEA1
EEF1A1
EEF1A2
EEF2
EEF2K
EFNA1
EFNA2
EFNA3
EFNA4
EFNA5
EFNB1
EFNB2
EFNB3
EGF
EGFR
EGLN1
EGLN2
EGLN3
EGR1
EGR2
EGR3
EHD1
EHD3
EHMT1
EHMT2
EI24
EIF1
EIF1AX
EIF1AY
EIF1B
EIF2AK1
EIF2AK2
EIF2AK3
EIF2AK4
EIF2B1
EIF2B2
EIF2B3
EIF2B4
EIF2B5
EIF2S1
EIF2S2
EIF2S3
EIF3A
EIF3B
EIF3C
EIF3CL
EIF3D
EIF3E
EIF3F
EIF3G
EIF3H
EIF3I
EIF3J
EIF4A1
EIF4A2
EIF4A3
EIF4B
EIF4E
EIF4E1B
EIF4E2
EIF4EBP1
EIF4G1
EIF4G2
EIF4G3
EIF5
ELAVL1
ELF5
ELK1
ELK4
ELMO1
ELMO2
ELMO3
ELOVL1
ELOVL2
ELOVL3
ELOVL4
ELOVL5
ELOVL6
ELOVL7
EML4
ENAH
ENO1
ENO2
ENO3
ENOPH1
ENPP1
ENPP2
ENPP3
ENPP4
ENPP6
ENPP7
ENTPD1
ENTPD2
ENTPD3
ENTPD4
ENTPD5
ENTPD6
ENTPD8
EP300
EPAS1
EPB41
EPB41L1
EPB41L2
EPB41L3
EPHA1
EPHA2
EPHA3
EPHA4
EPHA5
EPHA6
EPHA7
EPHA8
EPHB1
EPHB2
EPHB3
EPHB4
EPHB6
EPHX1
EPHX2
EPO
EPOR
EPRS
EPT1
ERBB2
ERBB2IP
ERBB3
ERBB4
EREG
ERN1
ESAM
ESD
ESPL1
ESR1
ESR2
ESRRB
ETHE1
ETNK1
ETNK2
ETNPPL
ETS1
ETS2
ETV6
ETV7
EXOC2
EXOC7
EXT1
EXT2
EXTL1
EXTL2
EXTL3
EZH2
EZR
F10
F11
F11R
F12
F13A1
F13B
F2
F2R
F2RL1
F2RL2
F2RL3
F3
F9
FAAP24
FABP1
FABP2
FABP4
FADD
FADS2
FAH
FAHD1
FAM213B
FANCM
FARP2
FARS2
FARSA
FARSB
FAS
FASLG
FASN
FAXDC2
FBP1
FBP2
FBXL3
FBXO25
FBXO32
FBXO43
FBXO5
FBXW11
FCER1A
FCER1G
FCER2
FCGR1A
FCGR2A
FCGR2B
FCGR2C
FCGR3A
FCGR3B
FDFT1
FDPS
FECH
FER
FERMT3
FES
FFAR1
FFAR2
FGA
FGB
FGD1
FGD3
FGF1
FGF10
FGF11
FGF12
FGF13
FGF14
FGF16
FGF17
FGF18
FGF19
FGF2
FGF20
FGF21
FGF22
FGF23
FGF3
FGF4
FGF5
FGF6
FGF7
FGF8
FGF9
FGFR1
FGFR2
FGFR3
FGFR4
FGG
FGR
FH
FHIT
FHL2
FIGF
FLAD1
FLNA
FLNB
FLNC
FLOT1
FLOT2
FLT1
FLT3
FLT3LG
FLT4
FMO1
FMO2
FMO3
FMO4
FMO5
FMR1
FN1
FNTA
FNTB
FOLH1
FOS
FOSB
FOSL1
FOSL2
FOXA2
FOXA3
FOXO1
FOXO3
FOXO4
FOXO6
FOXP1
FOXP3
FPGS
FPGT
FPR1
FPR2
FPR3
FRAT1
FRAT2
FRS2
FSHB
FSHR
FST
FTCD
FUK
FUT1
FUT2
FUT3
FUT4
FUT5
FUT6
FUT7
FUT8
FUT9
FXN
FXR1
FXR2
FXYD1
FXYD2
FXYD4
FYN
FZD1
FZD10
FZD2
FZD3
FZD4
FZD5
FZD6
FZD7
FZD8
FZD9
FZR1
G6PC
G6PC2
G6PC3
G6PD
GAA
GAB1
GAB2
GABARAP
GABARAPL1
GABARAPL2
GABBR1
GABBR2
GABRA1
GABRA2
GABRA3
GABRA4
GABRA5
GABRA6
GABRB1
GABRB2
GABRB3
GABRD
GABRE
GABRG1
GABRG2
GABRG3
GABRP
GABRQ
GABRR1
GABRR2
GABRR3
GAD1
GAD2
GADD45A
GADD45B
GADD45G
GADL1
GAL3ST1
GALC
GALE
GALK1
GALM
GALNS
GALNT1
GALNT10
GALNT11
GALNT12
GALNT13
GALNT14
GALNT15
GALNT16
GALNT18
GALNT2
GALNT3
GALNT4
GALNT5
GALNT6
GALNT7
GALNT8
GALNT9
GALNTL5
GALNTL6
GALT
GAMT
GANAB
GANC
GAPDH
GAPDHS
GARS
GART
GAS1
GAST
GATA3
GATA4
GATB
GATC
GATM
GBA
GBA2
GBA3
GBE1
GBGT1
GCAT
GCDH
GCG
GCGR
GCH1
GCK
GCLC
GCLM
GCNT1
GCNT2
GCNT3
GCNT4
GCSH
GDA
GDF5
GDF6
GDF7
GFPT1
GFPT2
GGCT
GGH
GGPS1
GGT1
GGT5
GGT6
GGT7
GH1
GH2
GHR
GHRL
GHSR
GIP
GIPR
GIT1
GJA1
GJD2
GK
GK2
gl:G00001
gl:G00002
gl:G00003
gl:G00004
gl:G00005
gl:G00006
gl:G00007
gl:G00008
gl:G00009
gl:G00010
gl:G00011
gl:G00012
gl:G00013
gl:G00014
gl:G00015
gl:G00016
gl:G00017
gl:G00018
gl:G00019
gl:G00020
gl:G00021
gl:G00022
gl:G00023
gl:G00024
gl:G00025
gl:G00026
gl:G00027
gl:G00028
gl:G00029
gl:G00031
gl:G00032
gl:G00035
gl:G00036
gl:G00037
gl:G00038
gl:G00039
gl:G00040
gl:G00042
gl:G00043
gl:G00044
gl:G00045
gl:G00046
gl:G00047
gl:G00048
gl:G00050
gl:G00051
gl:G00052
gl:G00054
gl:G00055
gl:G00056
gl:G00057
gl:G00058
gl:G00059
gl:G00060
gl:G00062
gl:G00063
gl:G00064
gl:G00066
gl:G00067
gl:G00068
gl:G00069
gl:G00071
gl:G00072
gl:G00073
gl:G00074
gl:G00075
gl:G00076
gl:G00077
gl:G00081
gl:G00082
gl:G00083
gl:G00084
gl:G00085
gl:G00086
gl:G00088
gl:G00089
gl:G00090
gl:G00092
gl:G00093
gl:G00094
gl:G00095
gl:G00097
gl:G00098
gl:G00099
gl:G00103
gl:G00104
gl:G00108
gl:G00109
gl:G00110
gl:G00111
gl:G00112
gl:G00113
gl:G00114
gl:G00115
gl:G00116
gl:G00117
gl:G00118
gl:G00119
gl:G00120
gl:G00123
gl:G00124
gl:G00125
gl:G00126
gl:G00127
gl:G00128
gl:G00129
gl:G00143
gl:G00144
gl:G00145
gl:G00146
gl:G00147
gl:G00148
gl:G00149
gl:G00154
gl:G00155
gl:G00156
gl:G00157
gl:G00158
gl:G00159
gl:G00160
gl:G00162
gl:G00163
gl:G00164
gl:G00171
gl:G00369
gl:G00526
gl:G00711
gl:G00872
gl:G01391
gl:G01945
gl:G01977
gl:G02632
gl:G09660
gl:G10505
gl:G10526
gl:G10595
gl:G10596
gl:G10597
gl:G10598
gl:G10599
gl:G10610
gl:G10611
gl:G10613
gl:G10614
gl:G10617
gl:G10618
gl:G10694
gl:G12336
gl:G12396
gl:G13034
gl:G13035
gl:G13036
gl:G13037
gl:G13038
gl:G13039
gl:G13040
gl:G13041
gl:G13042
gl:G13043
gl:G13044
gl:G13063
gl:G13064
gl:G13073
gl:G13074
GLA
GLB1
GLDC
GLG1
GLI1
GLI2
GLI3
GLO1
GLP1R
GLP2R
GLRA1
GLRA2
GLRA3
GLRB
GLS
GLS2
GLUD1
GLUD2
GLUL
GLYCTK
GMDS
GMPPA
GMPPB
GMPR
GMPR2
GMPS
GNA11
GNA12
GNA13
GNA14
GNA15
GNAI1
GNAI2
GNAI3
GNAL
GNAO1
GNAQ
GNAS
GNAT1
GNAT2
GNAT3
GNAZ
GNB1
GNB2
GNB2L1
GNB3
GNB4
GNB5
GNE
GNG10
GNG11
GNG12
GNG13
GNG2
GNG3
GNG4
GNG5
GNG7
GNG8
GNGT1
GNGT2
GNMT
GNPAT
GNPDA1
GNPDA2
GNPNAT1
GNRH1
GNRH2
GNRHR
GNS
GOT1
GOT2
GP6
GPAA1
GPAM
GPAT2
GPC1
GPC3
GPCPD1
GPD1
GPD1L
GPD2
GPER1
GPHN
GPI
GPLD1
GPR119
GPR156
GPR35
GPR50
GPR83
GPSM1
GPT
GPT2
GPX1
GPX2
GPX3
GPX4
GPX5
GPX6
GPX7
GPX8
GRAP2
GRB2
GRHPR
GRIA1
GRIA2
GRIA3
GRIA4
GRID1
GRID2
GRIK1
GRIK2
GRIK3
GRIK4
GRIK5
GRIN1
GRIN2A
GRIN2B
GRIN2C
GRIN2D
GRIN3A
GRIN3B
GRK1
GRK4
GRK5
GRK6
GRK7
GRM1
GRM2
GRM3
GRM4
GRM5
GRM6
GRM7
GRM8
GRPR
GSK3A
GSK3B
GSN
GSPT1
GSPT2
GSR
GSS
GSTA1
GSTA2
GSTA3
GSTA4
GSTA5
GSTK1
GSTM1
GSTM2
GSTM3
GSTM4
GSTM5
GSTO1
GSTO2
GSTP1
GSTT1
GSTT2
GSTT2B
GSTZ1
GTF2I
GTF2IRD1
[truncated: 4,388 more rows]
